# Supplementary material for: ISG15 deficiency and increased viral resistance in humans but not mice
Source: PubMed Central journal article supplement (PMC4873964; doi:10.1038/ncomms11496), 2016-05-19
Supplement: ncomms11496-s1.pdf [file ncomms11496-s1.pdf]

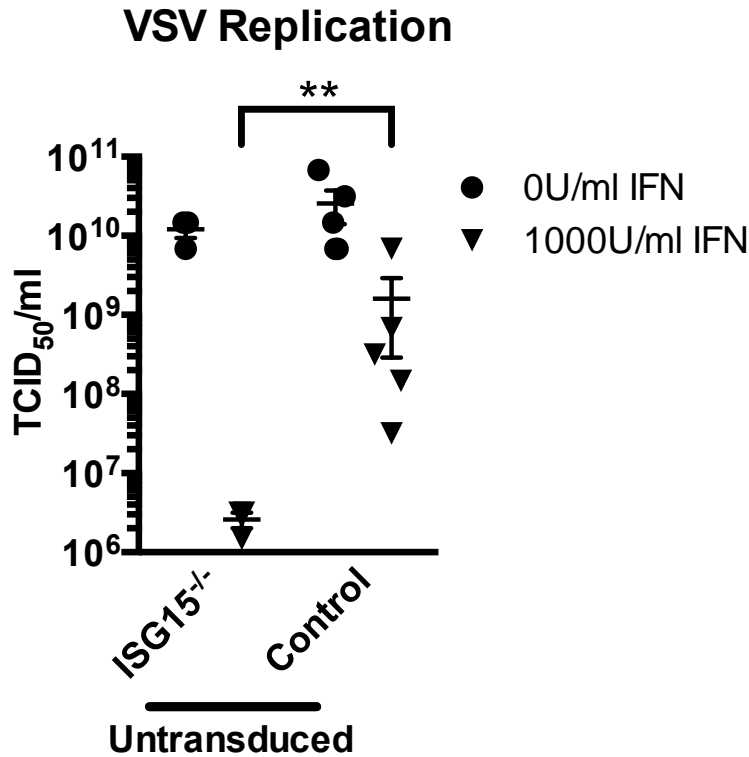

**Supplementary Figure 1 - *ISG15*-deficient cells exhibit resistance to infection with VSV**

hTert-immortalized fibroblasts from *ISG15*-deficient patients (n=3) or controls (n=5) were treated with the indicated concentration of IFN- $\alpha$ 2b for 12 h, washed, and allowed to rest for 36 h before infection. Cells were infected with VSV at an MOI of 1.0 for 24 h. Supernatants were titered by TCID<sub>50</sub>. Shown is a single experiment of three performed. Error bars = SD. Comparisons made with unpaired t-test. \*\*p<0.01.

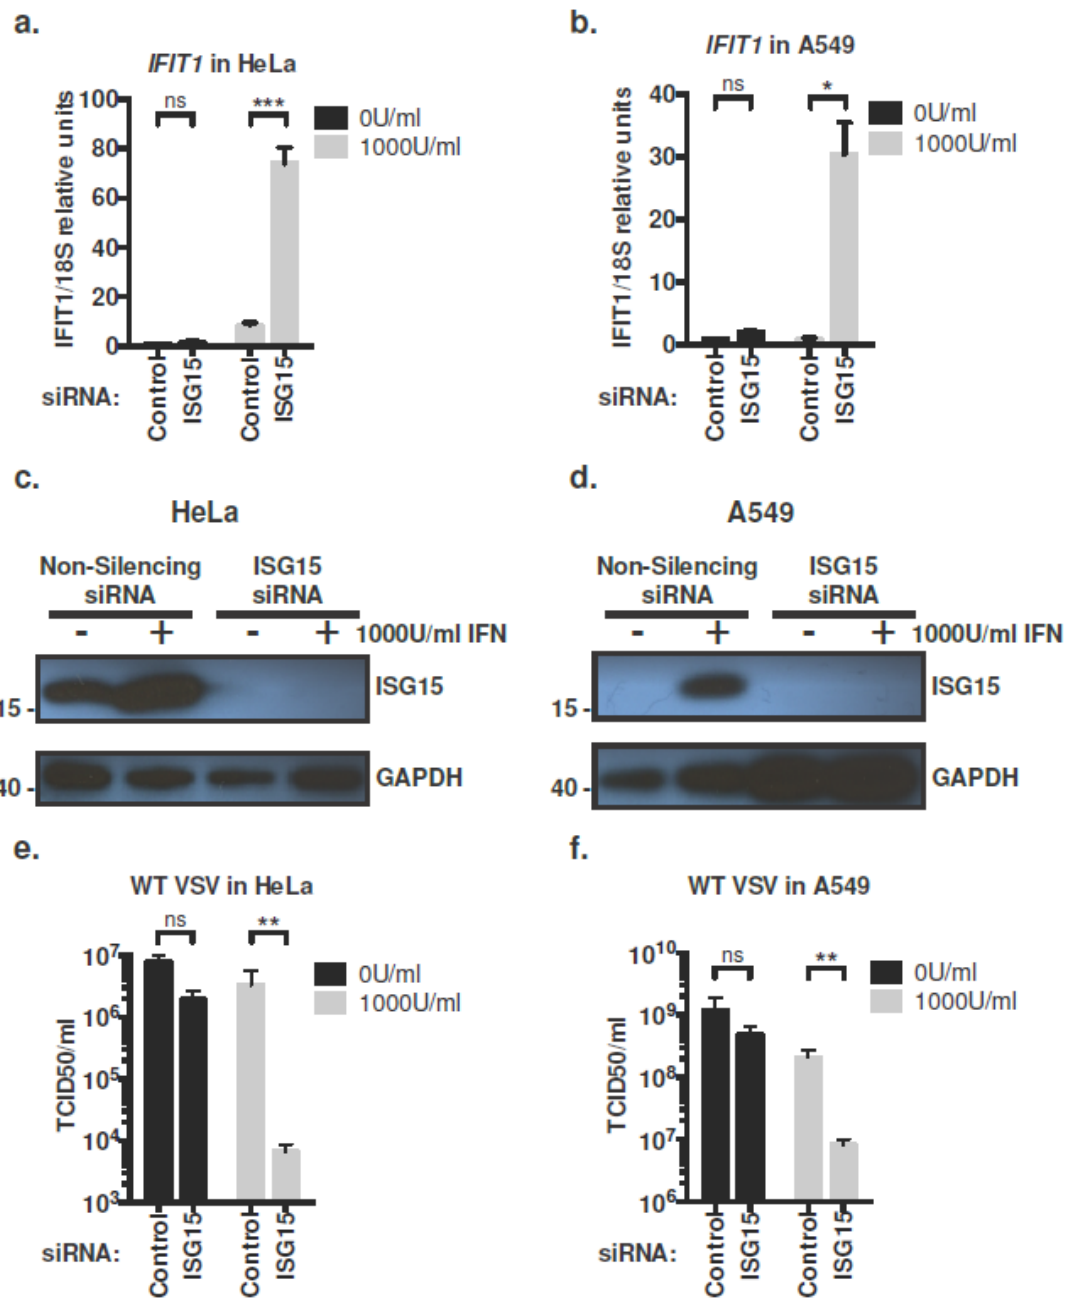

**Supplementary Figure 2 - siRNA knockdown of ISG15 in HeLa and A549 results in enhanced ISG expression and resistance to VSV infection**

(a), (c) and (e) HeLa cells and (b), (d) and (f) A549 cells were transfected with siRNA targeting ISG15 or a non-silencing control and incubated for 24 h. The cells were then treated with 0 or 1000 IU ml<sup>-1</sup> IFN- $\alpha$ 2b for 12 h, washed, and allowed to rest for 36 h before infection. Cell lysates were collected 48 h post-priming. Relative *IFIT1* mRNA expression levels were quantified by qPCR for (a) HeLa and (b) A549 cells. siRNA knockdown efficiency in (c) HeLa and (d) A549 cells was analyzed by western blot using antibodies against ISG15 and GAPDH. (e) HeLa and (f) A549 cells were infected with VSV at an MOI of 1.0 for 24 h. Supernatants were titered by TCID<sub>50</sub>. Panels (a), (b), (e), and (f) show the combined results of two experiments. Panels (c) and (d) show a single representative blot of two performed. Error bars = SD. Comparisons made with unpaired t-test. ns=not significant, \*p<0.05, \*\*p<0.01, \*\*\*p<0.001.

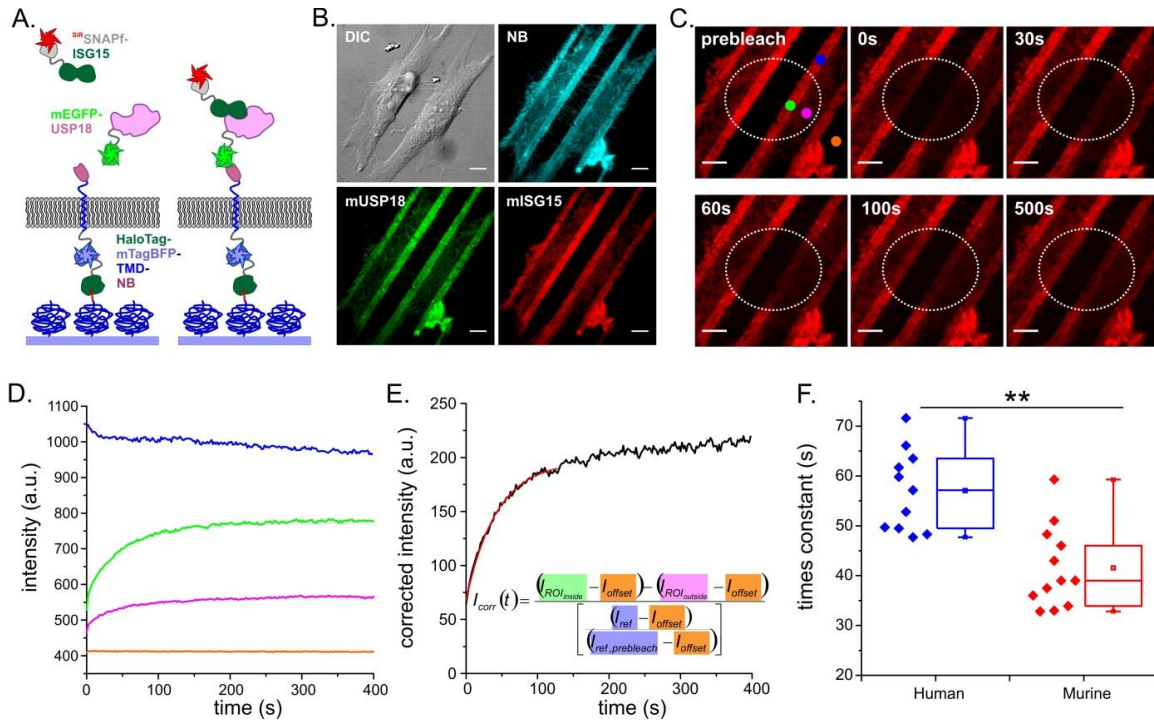

### Supplementary Figure 3 - Quantifying the stability of the ISG15:USP18 complex in living cells

(a) Cartoon depicting micropatterning of the USP18:ISM15 complex. HeLa cells expressing a transmembrane domain (TMD) fused to the HaloTag and mTagBFP at the extracellular N-terminus and an anti-GFP nanobody at the intracellular C-terminus (HaloTag-mTagBFP-TMD-NB) were cultured on cover slides presenting micropatterned HaloTag ligand (HTL, red). Upon coexpression of USP18 fused to mEGFP (mEGFP-USP18) and ISG15 fused to SNAPf (SNAPf-ISG15), capturing of USP18-ISM15 complexes into micropatterns is observed. (b) Typical experiment for the mUSP18-mISG15 complex showing two cells co-expressing HaloTag-mTagBFP-TMD-NB (cyan), mEGFP-mUSP18 (green) and SNAPf-mISG15 stained with BG-SiR (red). Scale bar: 10  $\mu\text{m}$ . (c) Fluorescence recovery after photobleaching (FRAP) experiment monitoring the exchange of bleached SiRSNAPf-mISG15 in micropatterns by unbleached SiRSNAPf-

mISG15 from the cytosol (cf. movie S1). Scale bar: 10  $\mu\text{m}$ . **(d)** Typical FRAP curves obtained in different regions, color-coded as depicted in the first image shown in (c). **(e)** FRAP curve corrected for background and photobleaching<sup>1</sup> according to the equation shown in the inset (same color coding as in c and d) and exponential fit (red line). **(f)** Box plots of complex lifetimes obtained for the human and the murine USP18/ISG15 complexes with each dot corresponding to an independent FRAP experiment. Mean complex lifetimes of  $(41 \pm 8)$  s and  $(57 \pm 8)$  s were obtained for the murine and the human complex, respectively ( $p=0.0012$ ).

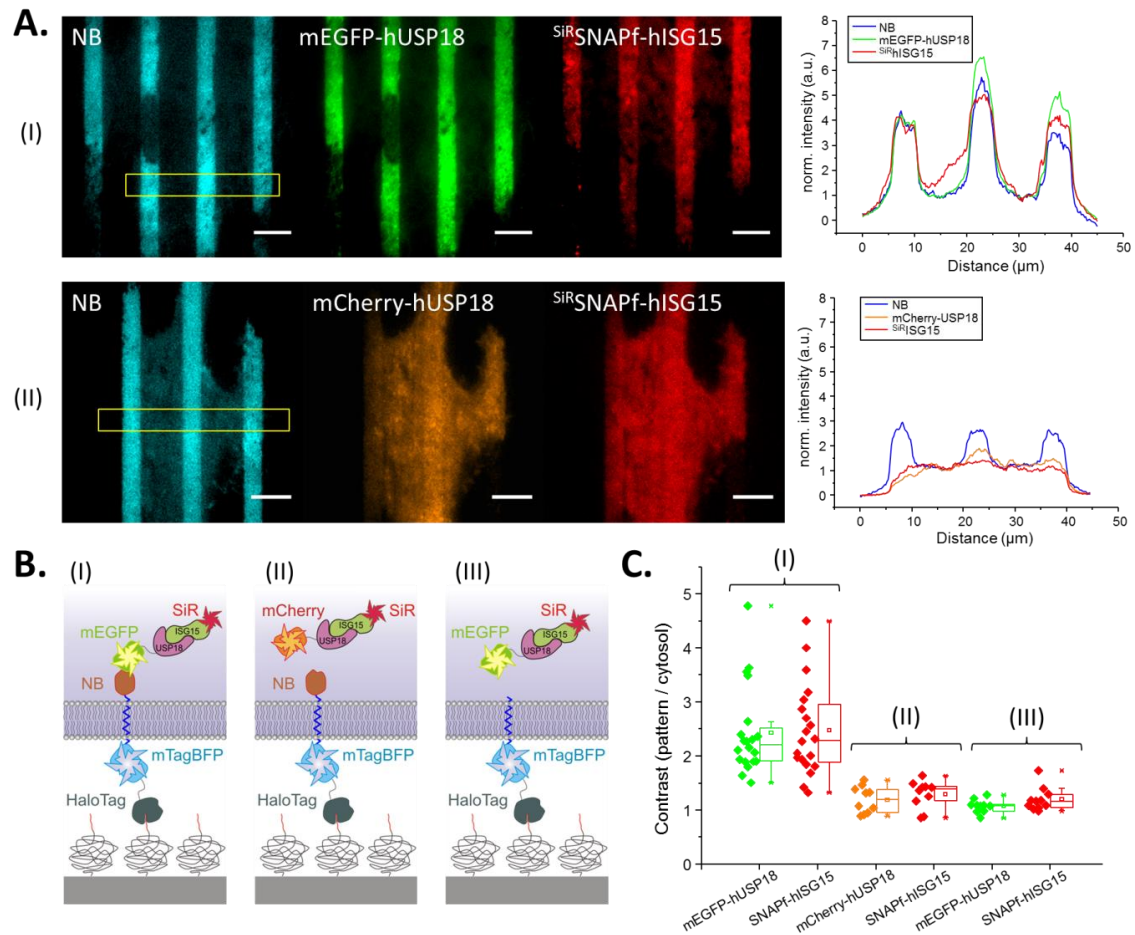

### Supplementary Figure 4 - Controls confirming specificity of micropatterning assays

(a) HeLa cells expressing anti-GFP NB, mEGFP-hUSP18 and SNAPf-hISG15 (I) compared to HeLa cells expressing anti-GFP NB, mCherry-hUSP18 and SNAPf-hISG15 (II). Intensity profiles across the micropatterned region highlighted by the yellow boxes are overlaid in the diagrams for all three channels of each experiment. (b) Cartoon depicting the binding experiment (I) and negative controls (II, III). (c) Box plot showing the contrast of binding experiment (I) and negative controls (II, III) according to the cartoons shown in B. Each dot corresponds to a single cell. A contrast of 1 (indicated by the dotted line) corresponds to the same intensity inside and outside the functionalized region.

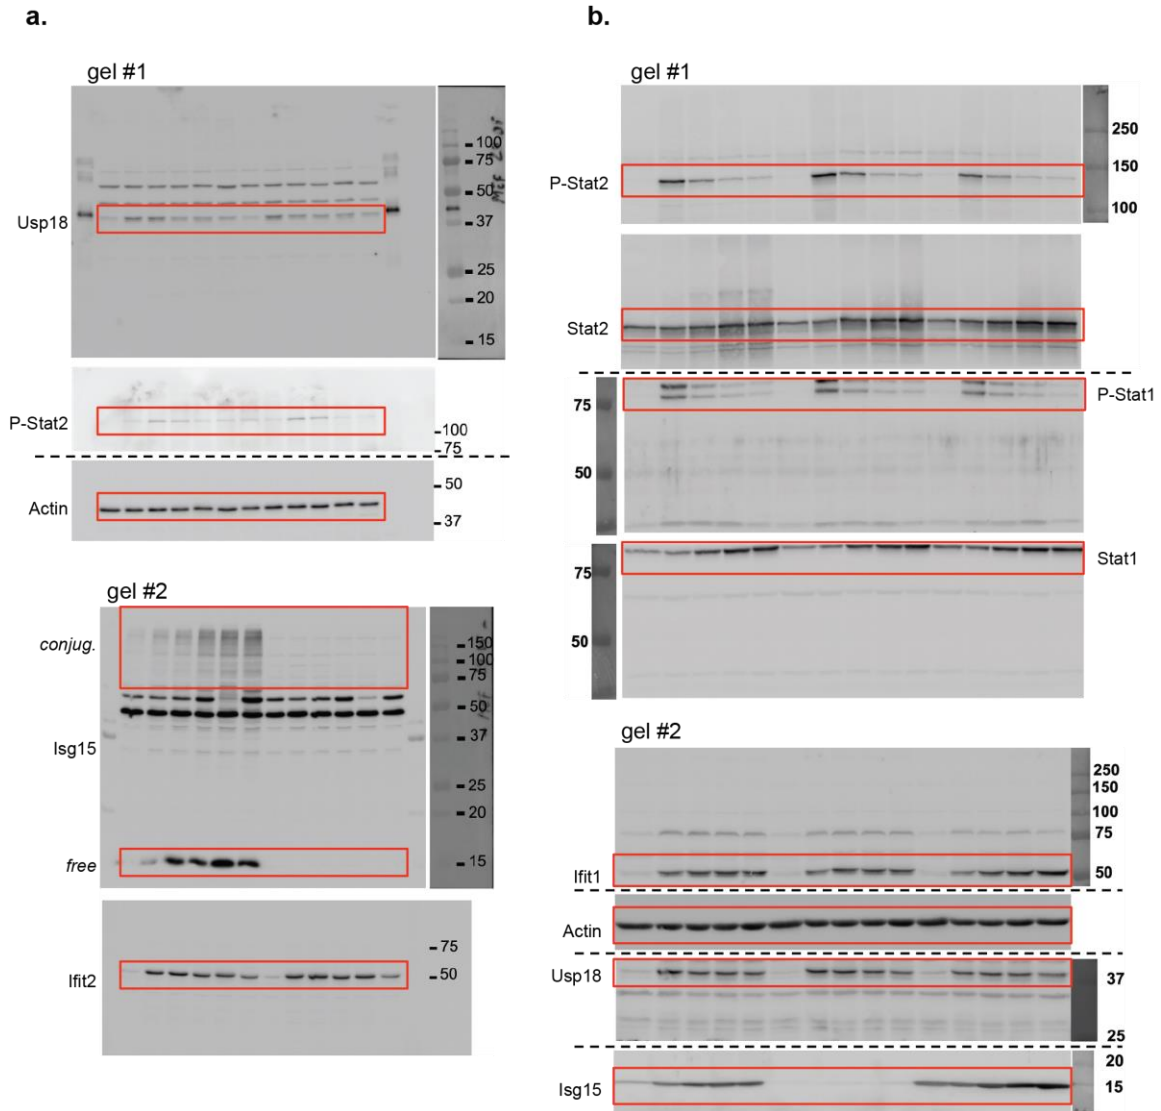

### Supplementary Figure 5 - Murine Isg15 does not control Usp18 accumulation and IFN- $\alpha/\beta$ signaling

Uncropped blots from Fig. 4. (a) Primary MEFs from WT and *Isg15*-deficient mice were primed with murine IFN- $\beta$  (500 pM) for 6-38 h. Cell lysates (30  $\mu$ g) were analyzed by western blotting with the antibodies indicated. (b) BMM from WT, *Isg15*-deficient and *Ube1L*-deficient mice were primed with murine IFN- $\alpha$ 4 (250 pM) for 4-36 h. Cell lysates (20  $\mu$ g) were analyzed by western blotting with the antibodies indicated.

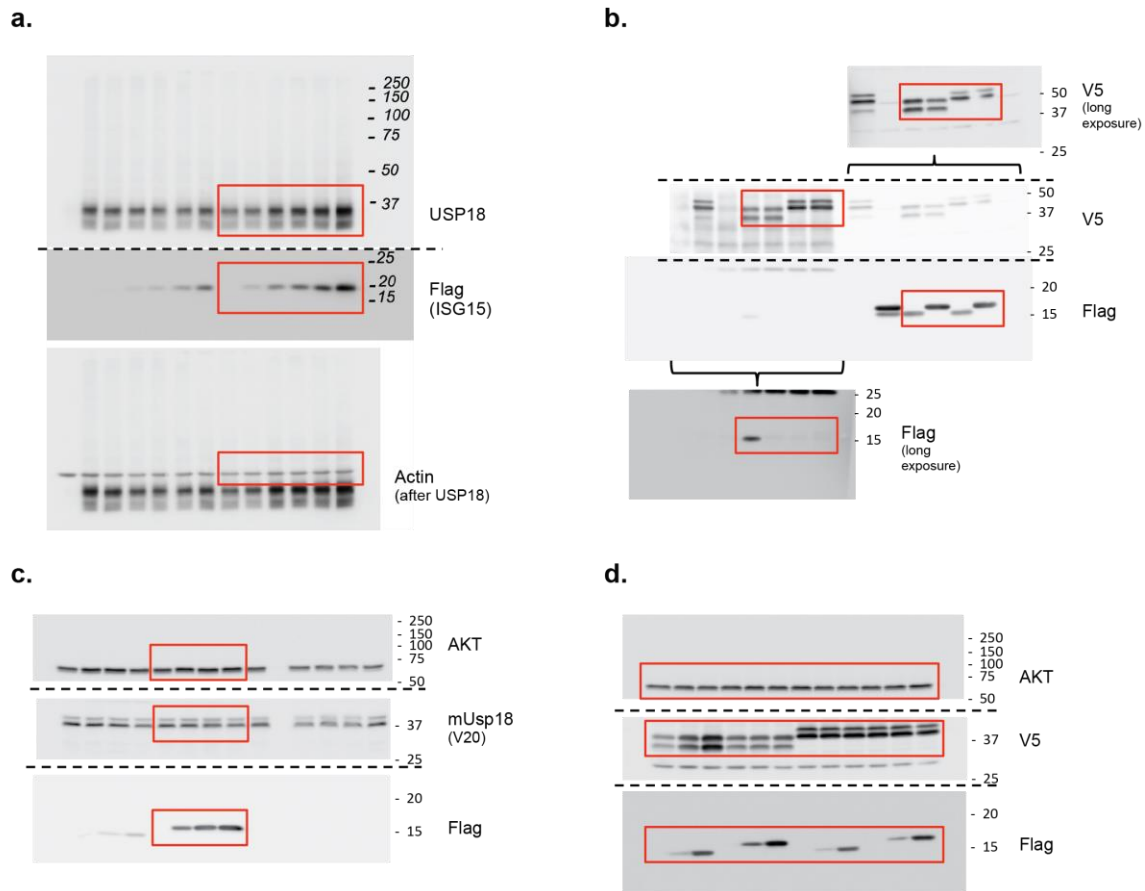

### Supplementary Figure 6 - Murine free Isg15 does not interact stably with Usp18

Uncropped blots from Fig. 5. **(a)** HEK293T cells were transfected with a human USP18 expression vector (0.5  $\mu$ g) alone or with increasing amounts of the human Flag-ISG15 $\Delta$ GG construct. 48 h post-transfection, cell lysates were analyzed by western blot with antibodies against USP18 and Flag. **(b)** Cells were cotransfected with human or murine USP18-V5 and human or murine Flag-ISG15. 48 h later, lysates were subjected to co-IP with anti-V5 antibodies. Co-IP eluates (top panels) and total lysates (bottom panels) were analyzed with the indicated antibodies. **(c)** Cells were transfected with untagged murine Usp18 (0.5  $\mu$ g) alone or with increasing amounts of murine Flag-Isg15. Lysates were analyzed with antibodies to murine Usp18, Flag and Akt. **(d)** Cells were transfected with human USP18-V5 or murine Usp18-V5 Usp18 (500 ng) alone or with



the indicated amount of human Flag-ISG15 or murine Flag-Isg15. 48 h later, cell lysates were analyzed by western blot.

## Supplementary Methods

**Live cell micropatterning** - For micropatterning HaloTag fusion proteins in the plasma membrane of live cells, glass coverslips were micropatterned functionalized with HTL by microcontact printing of poly-L-lysine-graft-poly (ethylene glycol) (PLL-PEG) functionalized with HaloTag ligand and backfilling with PLL-PEG functionalized with an RGD peptide<sup>2</sup>. For capturing cytosolic protein complexes into HTL micropatterns, the HaloTag fused to mTagBFP, a transmembrane domain (TMD) and an anti-GFP Nanobody (HaloTag-mTagBFP-TMD-NB) were cloned into the pDisplay vector (Invitrogen). As bait proteins, human USP18 and murine USP18, respectively were fused to an N-terminal mEGFP (mEGFP-mUSP18 and mEGFP-hUSP18, respectively) using the pSEMS-26m vector backbone. Human ISG15 and murine Isg15, respectively, were fused to an N-terminal SNAPf (SNAPf-ISG15) and cloned into the pSEMS-26m vector by cassettes cloning as described before. HeLa cells were transiently co-transfected with the three plasmids and cultivated on micropatterned support<sup>1</sup>. Prior to imaging, HeLa cells were labeled with 100 nM SNAP-Cell TMR-STAR or 100 nM BG-SiR for 30 minutes. Fluorescence imaging of transiently transfected HeLa cells was carried out with an inverted TIRF microscope (Olympus Cell<sup>^</sup>TIRF Xcellence) equipped with lasers for excitation at 405 nm (mTagBFP), 488 nm (mEGFP), 561 nm (TMR) and 640 nm (SiR). A 60× objective with an NA of 1.45 (U Apochromat N 60×/1.45 NA; Olympus) was applied for TIR excitation. Imaging and FRAP experiments were carried out at room temperature (25 °C) with cells kept under MEM medium<sup>1</sup>. For determining complex lifetimes, FRAP curves were fitted by a monoexponential function<sup>1</sup>.

## Supplementary References

1. Lochte, S., Waichman, S., Beutel, O., You, C. & Piehler, J. Live cell micropatterning reveals the dynamics of signaling complexes at the plasma membrane. *J Cell Biol* **207**, 407-18 (2014).
2. Wedeking, T. *et al.* Spatiotemporally Controlled Reorganization of Signaling Complexes in the Plasma Membrane of Living Cells. *Small* (2015).
